# Supplementary material
Source: PubMed Central journal article supplement (PMC6194814)
Supplement: jc.2017-02532.sd1.pdf [file jc.2017-02532.sd1.pdf]

**Supplementary Table 1: Follicle size, time of surgery in relation to hCG treatment, preoperative serum hormone concentrations, menstrual cycle day at the time of surgery, menstrual cycle length, and age of the study population. All data are given as means  $\pm$  SEM.**

|                       | Preovulatory phase                  | Early ovulatory phase               | Late ovulatory phase                |
|-----------------------|-------------------------------------|-------------------------------------|-------------------------------------|
| Follicle size (mm)    | 15.9 $\pm$ 0.7<br>range 14.0 – 17.0 | 17.1 $\pm$ 0.8<br>range 15.0 – 19.0 | 17.2 $\pm$ 0.8<br>range 15.0 – 20.0 |
| Hours after rhCG      |                                     | 14.0 $\pm$ 0.9<br>range 12.0 – 18.0 | 21.9 $\pm$ 0.8<br>range 19.0 – 24.0 |
| Progesterone (nmol/L) | 0.4 $\pm$ 0.04<br>range 0.3 – 0.5   | 1.2 $\pm$ 0.22<br>range 0.5 – 1.9   | 2.1 $\pm$ 0.3<br>range 1.5 – 3.0    |
| Estradiol (nmol/L)    | 0.5 $\pm$ 0.1<br>range 0.2 – 1.0    | 0.6 $\pm$ 0.1<br>range 0.4 – 0.9    | 0.7 $\pm$ 0.1<br>range 0.6 – 0.9    |
| Cycle day of surgery  | 14.0 $\pm$ 0.3<br>range 13 – 15     | 12.6 $\pm$ 0.5<br>range 11 – 14     | 13 $\pm$ 0.6<br>range 11 – 15       |
| Cycle length (days)   | 29.0 $\pm$ 0.6<br>range 28-35       | 27.2 $\pm$ 0.5<br>range 26 – 28     | 29.4 $\pm$ 0.9<br>range 28 – 32     |
| Age (years)           | 35.4 $\pm$ 1.2<br>range 31 – 38     | 33.8 $\pm$ 1.4<br>range 30 – 38     | 37.4 $\pm$ 1.4<br>range 36 – 38     |

All the patients recruited had a planned laparoscopic sterilization as a means of contraception and participated in the study voluntarily.

**Supplementary Table 2: Antibodies used for immunohistochemical, Western blot, and ChIP analyses.**

| <b>Target protein</b>       | <b>Immunogen</b>                                                             | <b>Entrez -Gene ID</b> | <b>Host</b> | <b>Clonality</b> | <b>Isotype</b> | <b>Name of Antibody</b>                               | <b>Manufacturer, Catalog #</b>     |
|-----------------------------|------------------------------------------------------------------------------|------------------------|-------------|------------------|----------------|-------------------------------------------------------|------------------------------------|
| FOS                         | Synthetic peptide corresponding to the sequence of human c-FOS               | 2353                   | Rabbit      | Monoclonal       | IgG            | c-Fos (9F6) Rabbit mAb                                | Cell Signaling, #2250              |
| JUN                         | GST-c-JUN protein derived from the N-terminal sequence of human c-JUN        | 3725                   | Rabbit      | Monoclonal       | IgG            | C-Jun (60A8) Rabbit mAb                               | Cell Signaling, #9165              |
| JUNB                        | Synthetic peptide corresponding to residues surrounding Pro169 of human JUNB | 3726                   | Rabbit      | Monoclonal       | IgG            | JunB (C37F9) Rabbit mAb                               | Cell Signaling, #3753              |
| JUND                        | Synthetic peptide corresponding to residues surrounding Pro250 of human JUND | 3727                   | Rabbit      | Monoclonal       | IgG            | JunD (D17G2) Rabbit mAb                               | Cell Signaling, #5000              |
| PGR                         | Synthetic peptide corresponding to residues surrounding Tyr541 of human PR   | 5241                   | Rabbit      | Monoclonal       | IgG            | PR A/B (DbQ2J) XP <sup>®</sup> Rabbit mAb             | Cell Signaling, #8757              |
| RNA polymerase II           | Synthetic peptide YSPTSpPS corresponding to human RNA pol II                 | 5430                   | Mouse       | Monoclonal       | IgG            | RNA pol II mAb                                        | Active Motif #39097                |
| Rabbit Control IgG for IHC  | No immunogen                                                                 | -                      | Rabbit      | Monoclonal       | IgG            | Rabbit (DA1E) mAb IgG XP <sup>®</sup> Isotype Control | Cell signaling, #3900              |
| Rabbit Control IgG for ChIP | No immunogen                                                                 | -                      | Rabbit      | Polyclonal       | IgG            | Normal Rabbit IgG                                     | Cell Signaling, #2729              |
| <b>Secondary antibodies</b> |                                                                              | <b>Conjugants</b>      |             | <b>Host</b>      | <b>Isotype</b> | <b>Application</b>                                    | <b>Manufacturer, Catalog #</b>     |
| Goat anti-rabbit antibody   |                                                                              | HRP-labeled polymer    |             | Goat             | IgG            | Immunohistochemistry                                  | Dako, K4065                        |
| Goat anti-rabbit antibody   |                                                                              | HRP                    |             | Goat             | IgG            | Western blotting                                      | Santa Cruz Biotechnology, #sc-2030 |

**Supplementary Table 3: Primer sequences (Forward and Reverse) used for real-time PCR analyses and ChIP assays**

| <b>Genes</b>             | <b>Accession No.</b> | <b>Forward primers</b> | <b>Reverse primers</b> |
|--------------------------|----------------------|------------------------|------------------------|
| <b>For Real-time PCR</b> |                      |                        |                        |
| <i>FOS</i>               | NM_005252.3          | AGGAGAATCCGAAGGGAAAG   | CTTCTCCTCCAGCAGGTTGG   |
| <i>JUN</i>               | NM_002228.3          | TGACTGCAAAGATGGAAACG   | GGGTCATGCTCTGTTTCAGG   |
| <i>JUNB</i>              | NM_002229.2          | TTAACAGGGAGGGGAAGAGG   | CACAGTACGGTGCAGAGAGG   |
| <i>JUND</i>              | NM_005354.5          | AGGCCCTGGAGGATTTACAC   | CTCAGGTTTCGCGTAGACAGG  |
| <i>PTGES</i>             | NM_004878.4          | GCTGATCACACCCACAGTTG   | CCAGGAAAAGGAAGGGGTAG   |
| <i>SLCO2A1</i>           | NM_005630.2          | TCAACATGAGCTCTGCAACC   | ATCAACAAGAAGTGCACCCC   |
| <i>ABCC4</i>             | NM_005845.4          | GGCTTGTGCTCTGAAAAGG    | CTGAGAGGATCGTCCAGGAG   |
| <i>RNA18S5</i>           | NR_046235.1          | GTAACCCGTTGAACCCATT    | CCATCCAATCGGTAGTAGGG   |
| <b>For ChIP assay</b>    |                      |                        |                        |
| <i>FOS</i>               |                      | CACCCCCTTCAAATGTCTTC   | GCCCTAATTCAGTGCAAAGC   |
| <i>PTGES</i>             |                      | GGCTAAAGGGATCAGCAGTG   | TCTGCACGTGGTGATTATCG   |
| <i>SLCO2A1 (1)</i>       |                      | ACCTCCTTCCCTCCCTCTC    | CCTCTTTTCCTCGGGTGTC    |
| <i>SLCO2A1 (2)</i>       |                      | CATTCCAGCACTGAGAAGGAG  | GTCTCTGGACCTGAGCCAAG   |
| <i>ABCC4 (1)</i>         |                      | CGACAGCATTTCATCCATCTC  | AGGCTCTTCAACCTGTGAGC   |
| <i>ABCC4 (2)</i>         |                      | CCTCCATGACAATCATTTGG   | CTGTTCGTCAAGCCCTAAAGC  |

**Supplementary Table 4. Relative abundance of FOS, JUN, JUNB, and JUND staining in granulosa and theca cells of human periovulatory follicles**

|                    |           | <b>Pre</b> | <b>EO</b>  | <b>Late</b> |
|--------------------|-----------|------------|------------|-------------|
| <b>FOS</b>         | <b>GC</b> | -          | +          | +++         |
|                    | <b>Th</b> | -          | +          | +++         |
| <b>JUN</b>         | <b>GC</b> | -          | +          | +           |
|                    | <b>Th</b> | -          | +          | +           |
| <b>JUNB</b>        | <b>GC</b> | -          | +++        | +++         |
|                    | <b>Th</b> | -          | +++        | +++         |
| <b>JUND</b>        | <b>GC</b> | -          | +++        | +++         |
|                    | <b>Th</b> | -          | +++        | +++         |
| <b>IgG Control</b> | <b>GC</b> | <b>N/A</b> | <b>N/A</b> | -           |
|                    | <b>Th</b> | <b>N/A</b> | <b>N/A</b> | -           |

Staining intensity: -, no staining detected; +, weak; ++, moderate; + + +, Strong. N/A, Not Available. GC, granulosa cells; Th, theca cells.

## A. Sequence of human *FOS* gene

-1517 AGCAGGATCTCCTGGCTCCDGGGCGGGGGCTGGAGGCAGGTCTGCGGTCDGCTCCDGGDGGCCDGAACATCCGCGCGCGDCTCATCTGCT

-1417 CGCCCTCTCCAGGTGCCACCGCGGGCCDGAACCCDGGGCGCGAAAGTGGAGAAAGGAAACCGGGCTGTGCGGGACATGCGTCTTCGGCCCTG

-1317 GAGGTGCCAGCGCGCTGGGCTGAGCCDGGCAGCGTACCDCGGTGTCTAOCAGCAGGGCAAGGATTGGGGGCGTGCCACACTCTGGAGCAC

-1217 TTGCTCCCAAGCC**CCGTGT**CCAGGACGTGGAGCCGCTCCTGGGTCCAGCAGTGCAGGTATCCGCCAGGCGCACTGGACACTGTCTTCCAG  
**PRA & PRB**<sup>-1196</sup>

-1117 CCCCCTCTCCACCCTCCAAAGTCCGCGCTGGAAAAACAACCCTGCGGGCTCCCGTAAAGCACAGCTTCTGGCGGGAACGAACCAACDCTCAAGCGAGA

-1017 TTTGAGTTCCCGCAAGAAAGCACACCCCGCTTGTTCATCCGAACTGACCAACCCGCGCACATAACCAACCTCGCACTCCCTAACCCCTGGGGCCAGCT  
**primer - F**

-917 CAGAACCGGCGAG**CACCCCTTCAAATGCTTC**CGACGTAAGTTTGC**CAGTGT**TATCTGCTGGTGTCTCAGGGATTTGACAGTTTCTTAATATTC  
**PRA & PRB**<sup>-861</sup>

-817 CCACACATGGCCGAGAAAAATAAATAAATAAATGCGCTGTCTTCTTAAAAATAAATAAATAAAGTACCCAGTATCGTAAAGTAGGTTATCGTATTCT

-717 CTTATTTGGATCTCCACTTCTGCTTCCAAAOCGAGG**ACAGT**CTAGTATTGCTCGAGCCGAGGGCTGGAGGTAGGGGATGAAGTCTGCTTCCA  
**primer - R** **PRA & PRB**<sup>-672</sup>

-617 **CGTTTGCACTGAATDAGGCT**TAGAATTGGGGATGGGGTAGGGGCGCATTCCTTCGGGAGCCGAGGCTAAAGTCTCGGGTCTGTACTCGATGCGGT

-517 TTCTCTATCTCTGAGCCTCAGAACTGTCTTCAAGTTCCTGACAAAGGTAAGGCGCTCTCTGCCCATCCDCCCGACCTCGG**AAACAAG**TCCGC  
**PRA & PRB**<sup>-424</sup>

-417 ATTGAACCAGTGC**GAATGT**CTCTCTCATTTCTGCGCCGTTCCCGCTCCCTCCDCCAGCCDGGGCGCCCGCTCCDCCCGCACTGCACCT**GGTGT**  
**PRA & PRB**<sup>-397</sup> **PRA & PRB**<sup>-318</sup>

-317 GGCTGCAGCCDGGAGCAAGTCCCGTCAATCCCTCCDCCCTTACACAGGATGTCCATATTAGGACATCTGCGTCAAGAGTTTCCAGGCCCTTCCCTGT

-217 AGCCCTGGGGGAGCCATCCDGAACCCCTCATCTTGGGGGCCACGAGACCTCTGAGACAGAACTGCGAAATGCTCAAGAGATTAGGACACGGGCC

-117 AAGCGGGGGCAAGGAGCTGCGAGCGCTGGGAOCGAGCCGGGGCCGCAAGAGCCAGGCCCGCGGCCACDCTCTGGCGCCACCGTGGTTGAGC

-17 CCGTGACGTTTACACTCATTTCATAAAA**CTTGT**ATAAAAAGCAGTGGCTGCGGCGCTCGTACTCCAACCGCATCTGCAAGAGCACTGAGAAACCAA  
**→TSS** **PRA & PRB**<sup>+12</sup>

+84 GACTGAGCCCGCCDGGCGCAGCGAAACGAGCAAGTGAOCGTGCTCCTACDCACTGTCTCCACAGCGCCACCTGTCTCCGCCCTCGGCCCTCGC

+184 CCGGCTTTGCTAACDCCAC**ATG**ATGTTCTCGGGCTCAAOCAGACTACGAGCGTTCATCCTCCGCTGCAAGAGCGTCCCGCGCGGGATAGC

## B. Sequence of human *PTGES* gene

-1385 TGA**TGACCC**LAGGCTCAGCGCCCTGATGGAGGCAGATGGGGCCTTTTAAACCCCTGCTGGGGAGCGGCTGCTGGGGAGGGGGCAACTCACCTGCGGTGG  
c-Fos<sup>-1112</sup>

-1285 GGGGTGAAAAGAGCGGTTTTAAAGGGACCATCCAAGCCAAGAAAAGCAAAGAGCAAAGAGAAAGAGCTCAGCAGCTCTCCCAAGCCCTCCACCTTGAGCTT

-1185 GGGAAATGGAGGCGGTTGGGAAAAGTTGGGGAGGAAAAGTGTGAGGTTGATGTTGTGAGGGGAGATGTACGGAAGGGCGGTGGGGTAAGGGGAGGGAG

-1085 TGGGGATGGGGAGGGATGGGTTATGAAAAGGAGCGCTGGGGGTTGTGAGAAAGGGTGGATATGGAAGGGAGGGGTAGGGGTGGGGTGGTGGGGAG

-985 TGAGTGTGGGGAGGGGTGGGTATGAAAAGGAGGGGCAAGGGTGGGGTGGTGTGGGGGAAAGATTGGGACATGGAAGGGAGGGGTGGGGTGGGTGGGT

-885 GTTGGGGATGTGTGTGGGGAGGATTGGGTTATGGAAGGAAAGACAGGGTGGGGTGGGGTGGGTGAGGGTGTGTGGGAGTGGTGGGTATGGAAGGGAGGC

-785 TTGGGTTGGGCTGGGTTGGGGTGGGTGTGGGGAGTGGTGGGTATGGAAGGGAGGTTGGGGTGGGAGACAGATGGGCATAGAAATGAGGTGTAAGTGTG

-685 GGAGGG**GGCTAAAGGGATCAGCAGTGT****GGGGTCA**AGCCCTCTGGCCCTTATCAGGGAGTCTGGGGCT**TGGGTCA**CCGGGATGGGCTTGGCATGGCTG  
c-Fos<sup>-659</sup> c-Fos<sup>-610</sup>

-585 GCTTTGTTTCTAAAGAGGACCTCTGGCTCTGCCGTGGAGGGCAAGGGGTGTGGACAGCCAGGCAAGTGGACACAGTGGGCAAGTGGCATGGCTCTTCTTC

-485 CCCAGTGGCTTGGACAGTCCCTGGCTACTGCCCAAGAGCTGGAAGACCCAGGTGCGGGGAGAGAAAGAGAGGGGCAAGTACCAGGATGGGGGGCCAT

-385 GGCCTGGTCTCATGCCACCACCTAC**CTGACCT**CCGGAGGTGGGAGGAGGCA**CGATAATCAACAGTGCAG**AGGTCCTGCCAGGTGCCAGCCTC  
c-Fos<sup>-350</sup> primer - R

-285 ATCATTCCTAGAAAGGCAAGCACCACCACATGCTCCCAACTGTAGATAAGGAAACAAGCTTTGAAAACAATTTGAAAAGTGTGAGGATTGCTGGAAG

-185 GAGGGCTCCAGAGCCAGGGACTGGGTCCGGGACACCCGGAGACTCTCTGCTTCTGGAGCTCCGGCAACTGCTTGTCTTCTCTTCACAGGAGAAAGGGG

-85 CCCTGCTGCGCTGCCGTGGGGCGGGGCGTGGGGGTGCTGGCTGCAAGAAAGCTCTCCCTCCCACTTGTGCTTCCCTGCAGCTGCTCCTCTGTGG  
|→TSS

+15 AGCTGATCACACCCACAGTTGAGTGCCTGCCAGAG**ATG**CCTGCCACAGCCTGGTGAAGAGCAAGCCCGGCCCTCCCGCCCTTCCTG

### C. Sequence of human *SLCO2A1* gene

-1434 GGCTGAATTCA GGGTCCAGCTCCACEACTT GCTAGCTGTGTGGCTTTCAGACAGCTTCTTAGCCGACTGCTCTAGCATCCTTGTGGAGTCCAGAC

-1334 TCCATCAGTACCTATACCTGTAGGGCTAACGTTGGGGCTTCATGAAATCATGCATGTGGGTGCTCAGCAGAGGGCCTGGTATGCCA GCA CACCCAA GT

-1234 GCTCCATGCTGGTACCTGTCTTGTGTGCCATGTTCTCCCA GTGGACAGATGGGACCTGGAATTCATGCCTCCTCTGGGGCTGGGGCTGGGGCTGCTACA

-1134 GTGCTGTGGAAA **CTGTGCAG** ATGTACCTGCTCTGTGGCTGAGTGAAGAGGCCAGAGGCTGCCACTGTTCAACATCTTTGGAATGCTGCCGTGCCA  
**c-Fos<sup>-1112</sup>**

-1034 GGGAACTTGGGTGACAGGTGGATAGAA GCCCCCAA GCCCAGGCCAGGCCA GACCAGGCCAGAAA GGTATCAGTCTTGGGTAGAATAAGAA GCTATGT

-934 GGTCTATCTATCCTGTGGCCTTTGTCTTAGCCAAA GCTCTGAT **TTGADGGD** TCTTTTCTGGGTTTGGGGTGGGCTTGAGAGAGTTCCCTCTGCA  
**c-Fos<sup>-878</sup>**

-834 CGGGACTACAGAA GTGAGGGAGCTGGA AAAATGCCTCCAGAGCTGGATTCTCACTGCA GCTGCTTTTGAAGA ACCTTCTATCCTTCCCTTGAGAAGC

-734 CTCCTGTCTCTCTCTGGGCTTGAATCCTGTTAGTAGAAAACTTTGGGAAAAAATAAACCCACTATTCATTCAGCACTGAGAA **GAGGTCA** TGGG  
**primer - F**  
**c-Fos<sup>-639</sup>**

-634 GTGCTCTGTTTGTCCACACCCCCCA CCCCCTCTACCCCTCCCCCA GCACCCAGGCCAGACCCAGCCAT **CTGACAT** **TGACAGT** CCTGCAGTT  
**primer - R**  
**c-Fos<sup>-545</sup>**

-534 TAC **CTTGGTCAAGTCCAGAGC** TCCGGGCCAGCCCCACCTTTCACTTGTTCACCA GCCCCTCTCCAGCGCAAAGAGCAGTTTAAATATAAATCA

-434 GTCCTCAACACAAA CAGAGCTGCA GCGAGTCTCAGAGCCATCACC GGA ACTGAGGGCCAGT TTTCTGGAGTGCAAACAAGCAGAGACTGGCTCCGTA

-334 AATCTCCCAA GAACGTCCGGAGGGGTGCTGGGGTCCCCTCCACCCCGGCTCAGGTTGGCCCTCCAGCGCCGCTCGGGCACCCTCATATCCCA GC

-234 CTTCCTGCCCCCA GDCCTGCCAACCTCTTCTCCATCCCTCCACTCACCCACCTTGCTTCGCCACCTCTCTTCGCCAGTCCCA GGAACCTCCAC

-134 CCCCTTGC AACCTCCTGCCCCCGCACAGCCCTCACCTCCCTCCCGGGCCCGCCACTCCTTCCCTCCCTCTCCGCTCCCGCA GCGGGATCTTCTC  
**c-Fos<sup>-23</sup>**

-34 GGG **CAAGTCAA** TCTCTCGGGTCTGCTGGGGCTC **CA** CACTGTCTGAGGGGGGCGCGGCGGCGGCGGGCGGGCGGGGCTCGTAGGCTT **TTGACACC**  
**c-Fos<sup>+2</sup>** → TSS **c-Fos<sup>+65</sup>**

+66 CGAGGAAAA GAGGGAGGAGGGAGAGCGGTTTCATCATCGGCGCGGCCACTTATAAAAACTTCTAGGCGCGCACTGCTGGCTCAGTCTCCGCTCCGCG

+166 AATCTCCTCCGGCACTGCCGCCGGGTGCTCTCACCCGCCGCTCCAGCCGAGGCGCCCGACCCCGGCCACTCCGCGCCGGCCAGCCGC

+266 CCGCAGCC **ATG** GGGCTCCTGCCAAGCTCGGGGCTCCAGGGCA GCGACACTCTACTAGCCGAGCCGGCCGCTGTGCCGCTCGGTCTTCGGCAACAT

+366 TAAG

## D. Sequence of human *ABCC4* gene

-1534 CAACCAGCATATTCTGGGCACCTTCTCATGCACACTGGCCATCCACCAGGGAGACAGGCCATGCTTAGACATAGGCTTATTGCAAATCATGTTTTATCCTT  
 -1434 TCTTGGCTCTAAGACTGGACAAGTTCTGCCTTTCAGCTTCACTTCTCATCTATAAAGTAAAGGATAACCTTGAATGGGGCACTGATAGAATTAAGTGTG  
 -1334 AGATAATTGGTCGGGCGTGGTGTACATGCCTGTAATCCTAGCACCTTTGGGAGGCCACGGTGGGAGGATCACTTGAGCCTAAGGATTGAGACCAACGCTG  
 -1234 GGCAACAAAGTGAGAAATATCAAGGAACAATAAAATGATCTTATTACAAAAGAAAACCAAATTTCTCAACATGCATGAAATATGAGAAAATAAACCTCC  
 2<sup>nd</sup> primer - F  
 -1134 **ATGACAAATCATTGG**CTTCAAAAATTATCAGTATTTGAACTTGGAGCCTTTGATTTTGTATTTTGCATCTCTACAAAAATTACAAAATATGAGCCGGGTG  
 c-Fos<sup>-1127</sup>  
 -1034 TGGTGGGGGTGCCTGTAGTCCTAGCTACTTAAACTGAGTTGGGAGGATTGCTTGAACCTGGGAGGTCGAGGGTGAATGAGCCATAAT**GTGACACT**  
 c-Fos<sup>-936</sup>  
 -934 TGTGTGAGACTGCCACACACACACACACACACACTAGTGAAGGCTACGCACCTCAGAAATGCACATGAACATCACTGGTATTCTGGAAACCCACGCTGTC  
 2<sup>nd</sup> primer - R  
 -834 GTTTGCCACTGTATCTGTAG**GGCTTAGGGTTGACGACAG**AAATCATCAGGCAGTCTCTCTTTCTTATATTCCTTTCCCAATCTAAGGGGGCAGC  
 c-Fos<sup>-799</sup>  
 -734 AAAAACTCAGAGGTCCACCGTAGCATGCAACATGTGAGATGCTAAAAGCCCGCCCATCGA**CGACAGCATTCATCCATCTC**CGAATTCAT**GGGTG**  
 c-Fos<sup>-632</sup>  
 -634 **AT**ACTCTCGAGTTACCCGGCTTTCTTGGGTCTTGCAGCTCTACAAGGATAATCTGTGGCTAAACTTTGCTGTCGTC**AAGGTCAA**ATGTTT**GGTCCACA**  
 1<sup>st</sup> primer - R  
 c-Fos<sup>-548</sup>  
 -534 **GGTTGAAGAGCT**TCCATGGCACCCTCGTTTGGTCCCTGAGAAAGGAAAGGCGCCAGGGGGGGGGCTGCTAGAGCACGAGGCACTGTCTCCAGTCTTC  
 -434 CCAAAACCCGTAGCCGAGGGGGGCTTTCTGCGGCAGAGGGGGGGGCACAGCCGACCGCTCCCTGCTCCACCTCTGTGTGGGGCCCTAGACTCGGATAGTG  
 -334 AATTTGGAAAATTTCACTCGGGTTCGTGCACGTTGGGCACTCCGGACCCGGCTCCTTGGCGGGCTCTGCTACCTCTCCATCCAGCGGCACAGGCG  
 -234 GCCCTCGCTCAACCCCTGGGCGTAGCTCTGGCTCCCTTTGGGCTGCGCAAGCTTGGCTCCTCCCGCCGGTCTCCTCCCG**GGGTCA**CCGTCGGTCC  
 c-Fos<sup>-145</sup>  
 -134 CGGCCGGCTCGCACGCGGTGGCAGCTCCCGGCTCCAGGCGCGCGCGGTAAGCGCGGCCCGGAGGCGGGGCTGAGAGGCGGGGACGGGGGCTG  
 -34 CCGCCGGCGCCCGCTCCCGAAAGCGCTGCTT**CC**CAGGCTCCAGCCGAGCGGACAGGCGTGGGCGCGGAGCCCAGCATCCCTGCTT**GAGGTCCAGGA**  
 → TSS  
 +66 GCGGAGCCCGCGCCACCCGCGCTGATCAAGCGGACCCCGGCCCGGCCCGCCCGCCGCAAG**ATG**CTGCCGTGTACCAAGGAGGTGAAGCCCAACC

**Supplementary Fig. 1: Transcription factor binding motifs in nucleotide sequences of promoter regions for human *FOS*, *PTGES*, *SLCO2A1*, and *ABCC4*.**

Promoter sequences of human *FOS* (A), *PTGES* (B), *SLCO2A1* (C), and *ABCC4* (D) were analyzed using a genomic library. Nucleotide sequences are numbered from TSS at +1. The sequences of the oligonucleotide primers are colored in red. Putative PRA, PRB, or c-FOS transcription factor binding sites (highlighted in black boxes) are predicted by TFSEARCH.



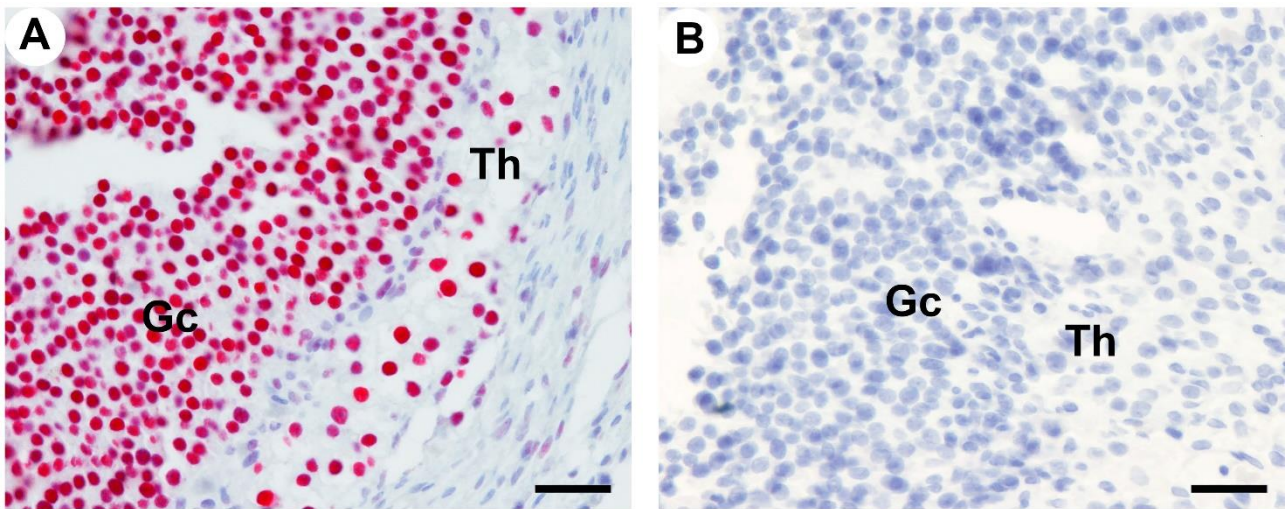

**Supplemental Fig. 2: Immunohistochemical analyses of human periovulatory follicles with the antibody for JUND and rabbit IgG as a negative control.**

Paraffin-embedded sections of dominant follicles collected during the late ovulatory period were subjected to immunohistochemical analyses by incubating with the antibody for JUND (A) and concentration matching normal rabbit IgG (B) as a negative control. The red/pink staining represents immunopositive staining for JUND. The section was lightly stained with hematoxylin (blue) for nuclear staining. Gc, granulosa cells; Tc, theca cells. Scale bar, 100  $\mu$ M for all the images.

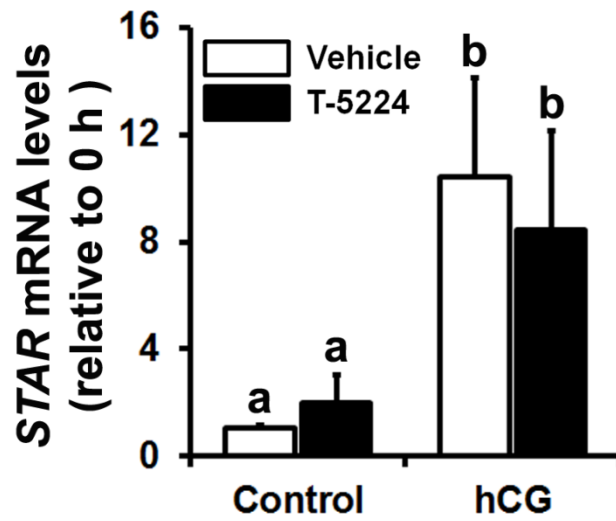

**Supplemental Fig. 3: Effect of FOS inhibitor on the expression of mRNA for *STAR* in hGLC.**

Primary hGLC were treated with or without T-5224 (FOS inhibitor, 20  $\mu$ M) in the absence or presence of hCG (1 IU/ml). The levels of mRNA for *STAR* at 12 h were measured by qPCR. The levels of transcripts were normalized to those of *RNA18S5* mRNA in each sample (n = 3 independent experiments). Bars with no common superscripts in each time point are significantly different ( $p < 0.05$ ).
